# Supplementary material
Source: PubMed Central journal article supplement (PMC7080588)

| Sample | Genotype                  | Age   | Reads per cell | Sequencer   | Post-aggregation           |               |
|--------|---------------------------|-------|----------------|-------------|----------------------------|---------------|
| 1a     | <i>Tg(olig2:GFP)vu12</i>  | 1 dpf | 62,016         | HiSeq 4000  | Number of Cells            | 44,102        |
| 1b     | <i>Tg(olig2:GFP)vu12</i>  | 1 dpf | 49,699         | HiSeq 4000  | Fraction reads in cells    | 71.5%         |
| 2a     | <i>Tg(elavl3:GCaMP6s)</i> | 2 dpf | 74,928         | NextSeq 500 | Mean reads per cell        | 74,914        |
| 2b     | <i>Tg(olig2:GFP)vu12</i>  | 2 dpf | 53,287         | HiSeq 4000  | Median genes per cell      | 1,807         |
| 5a     | <i>Tg(olig2:GFP)vu12</i>  | 5 dpf | 135,685        | HiSeq 4000  | Median UMI counts per cell | 8,345         |
| 5b     | <i>Tg(olig2:GFP)vu12</i>  | 5 dpf | 122,920        | HiSeq 4000  | Total number of reads      | 3,303,866,971 |

C - 1 dpf

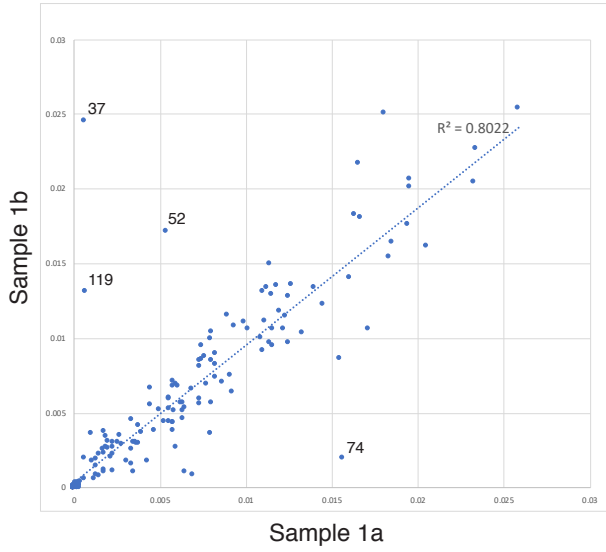

F - 1 dpf

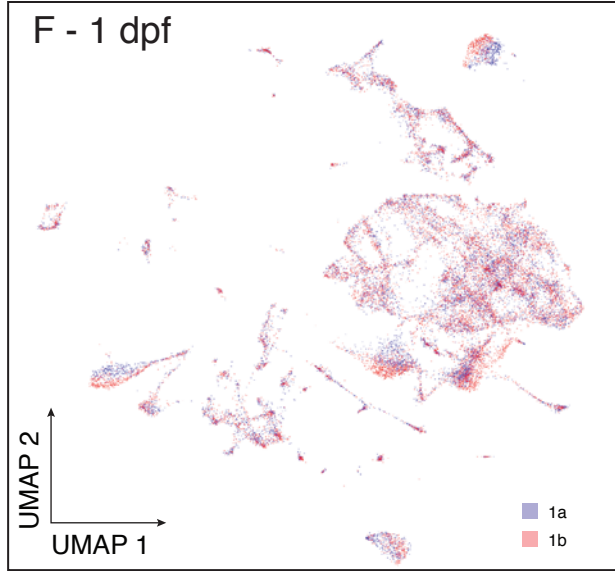

D - 2 dpf

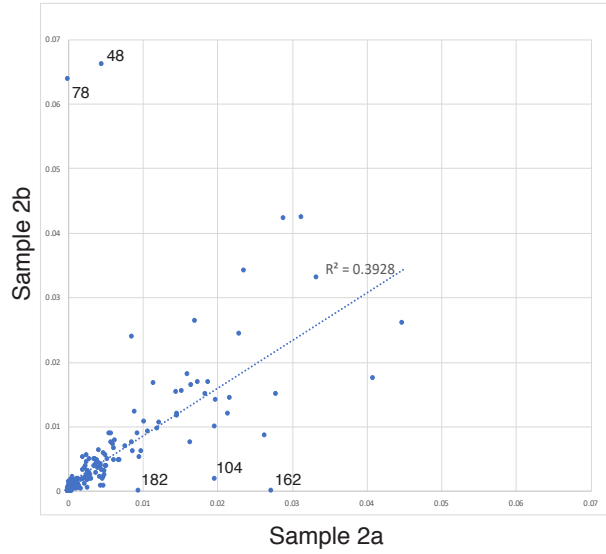

G - 2 dpf

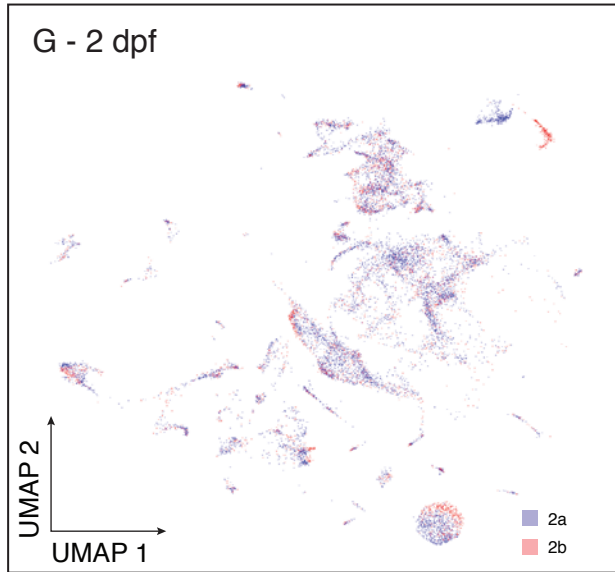

E - 5 dpf

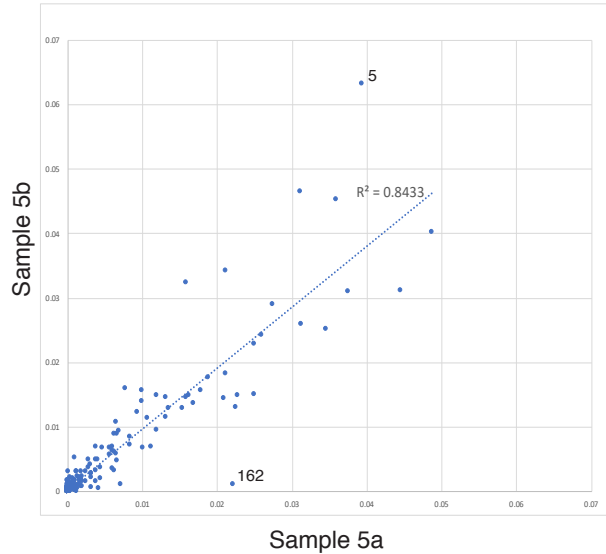

H - 5 dpf

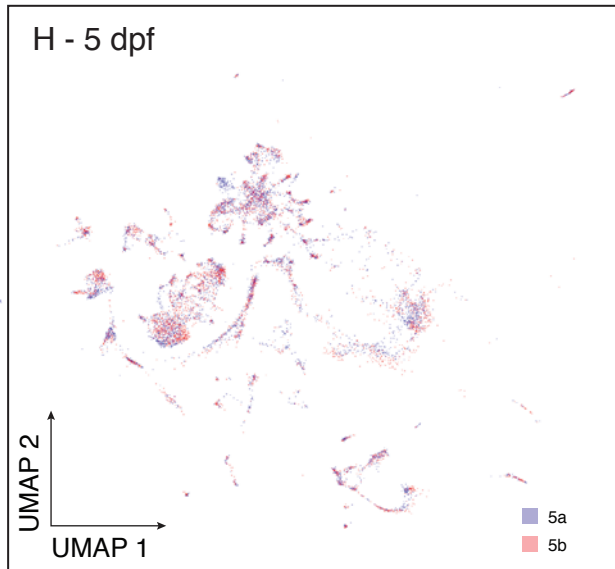

Supplement: NIHMS1545987-supplement-1.pdf [file NIHMS1545987-supplement-1.pdf]
