# Supplementary material
Source: PubMed Central journal article supplement (PMC7080588)

Figure S2

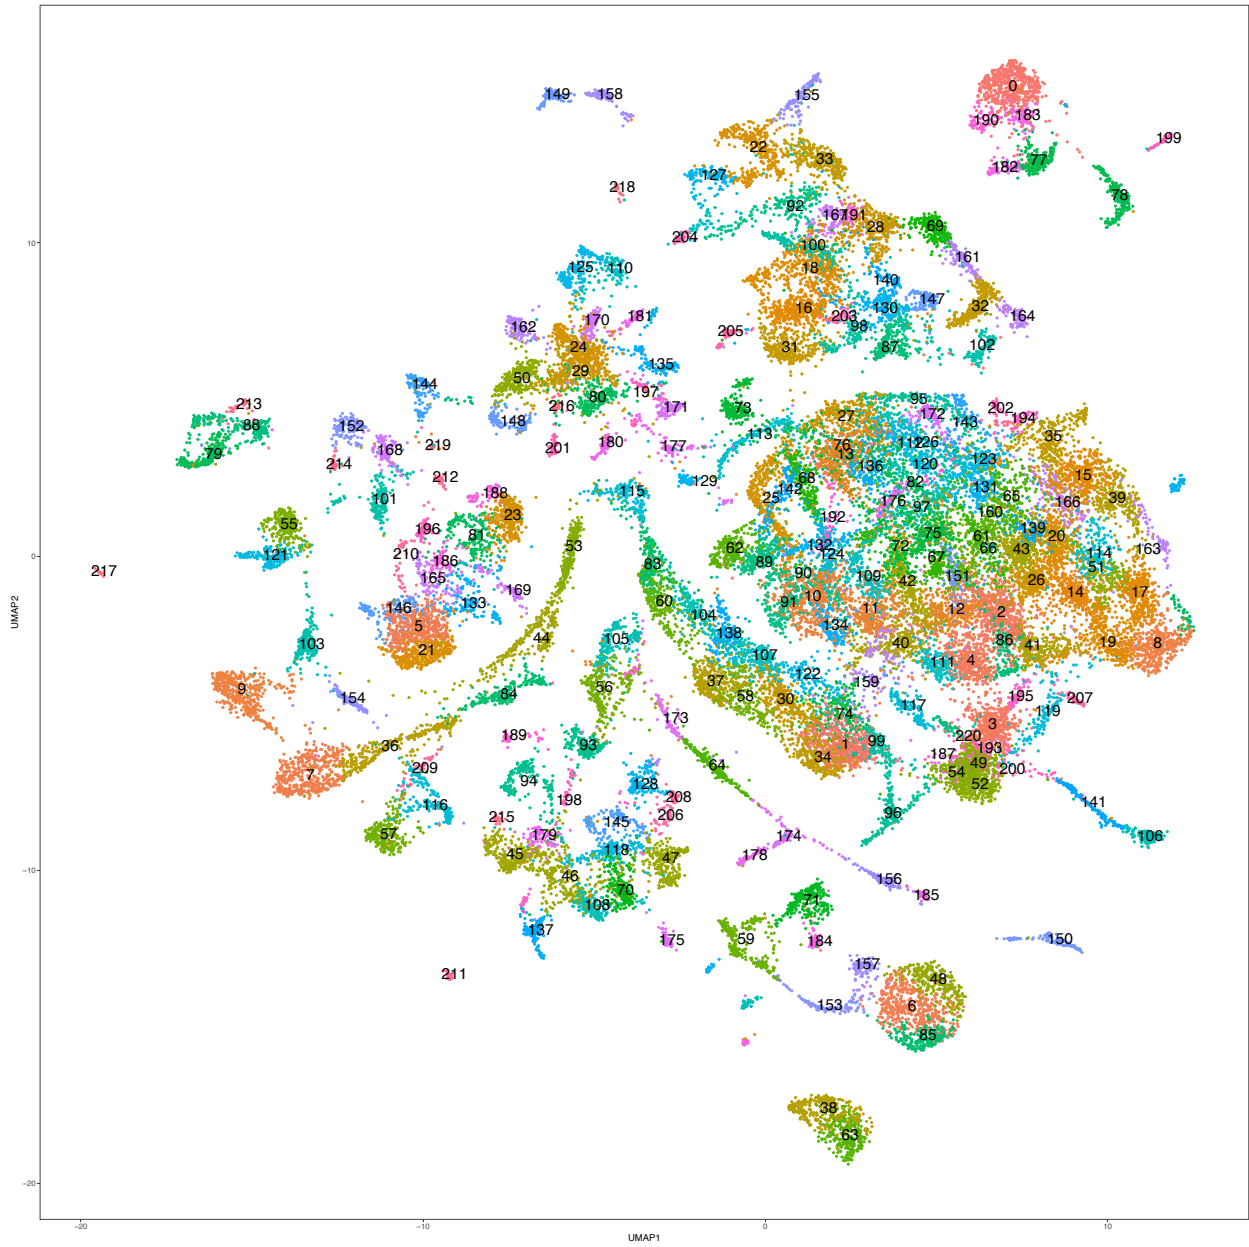

Supplement: NIHMS1545987-supplement-2.pdf [file NIHMS1545987-supplement-2.pdf]

Figure S3

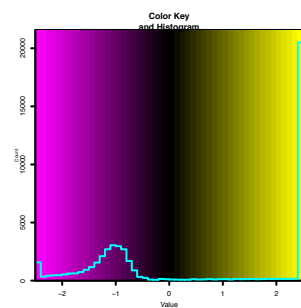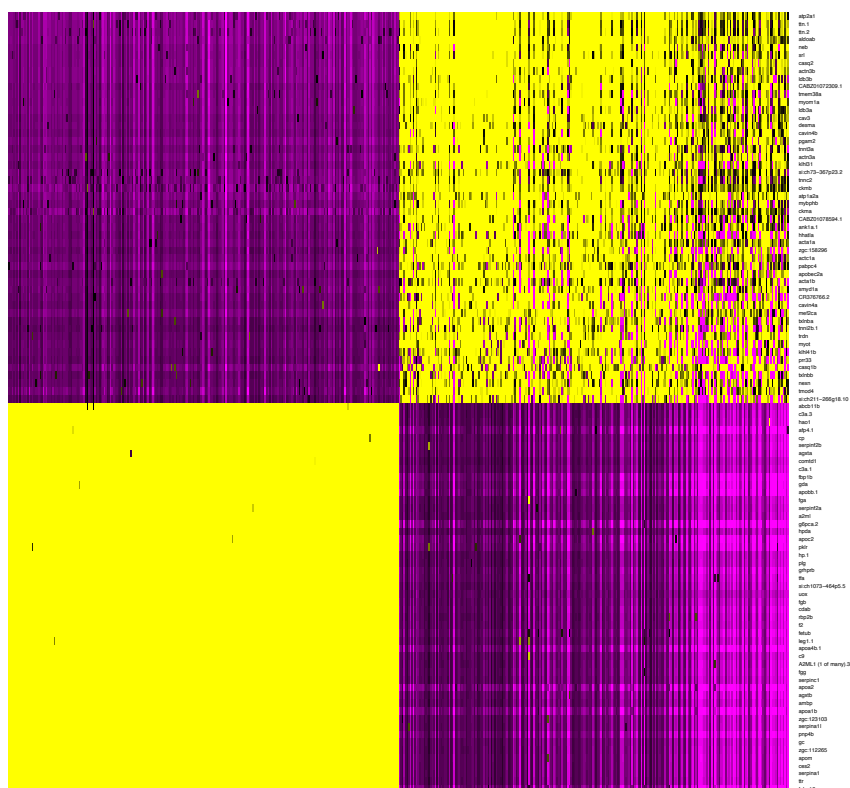

Supplement: NIHMS1545987-supplement-3.pdf [file NIHMS1545987-supplement-3.pdf]

Figure S4

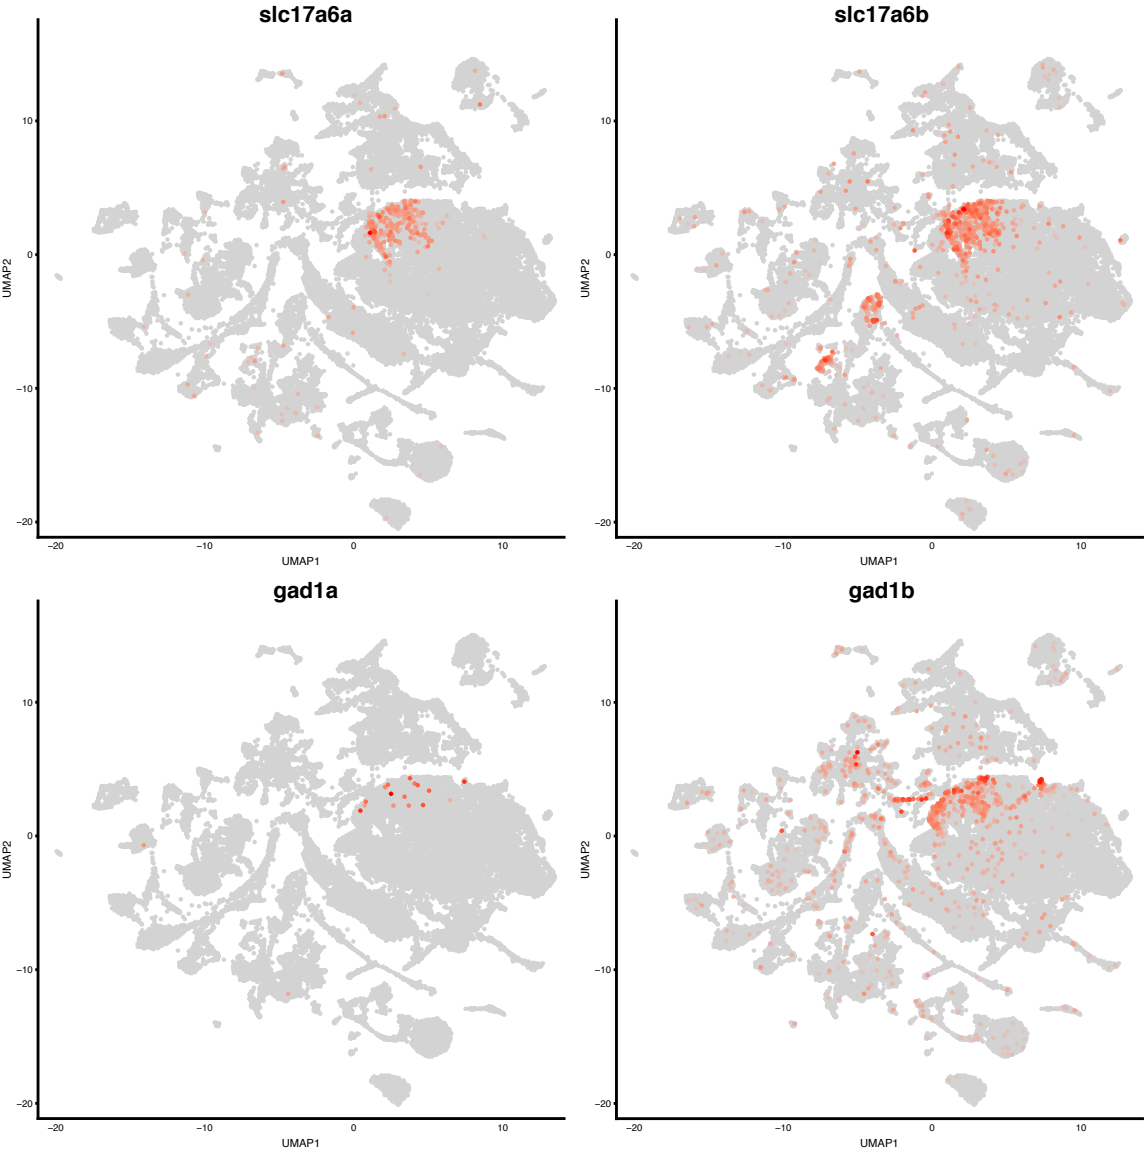

Supplement: NIHMS1545987-supplement-4.pdf [file NIHMS1545987-supplement-4.pdf]

Figure S5

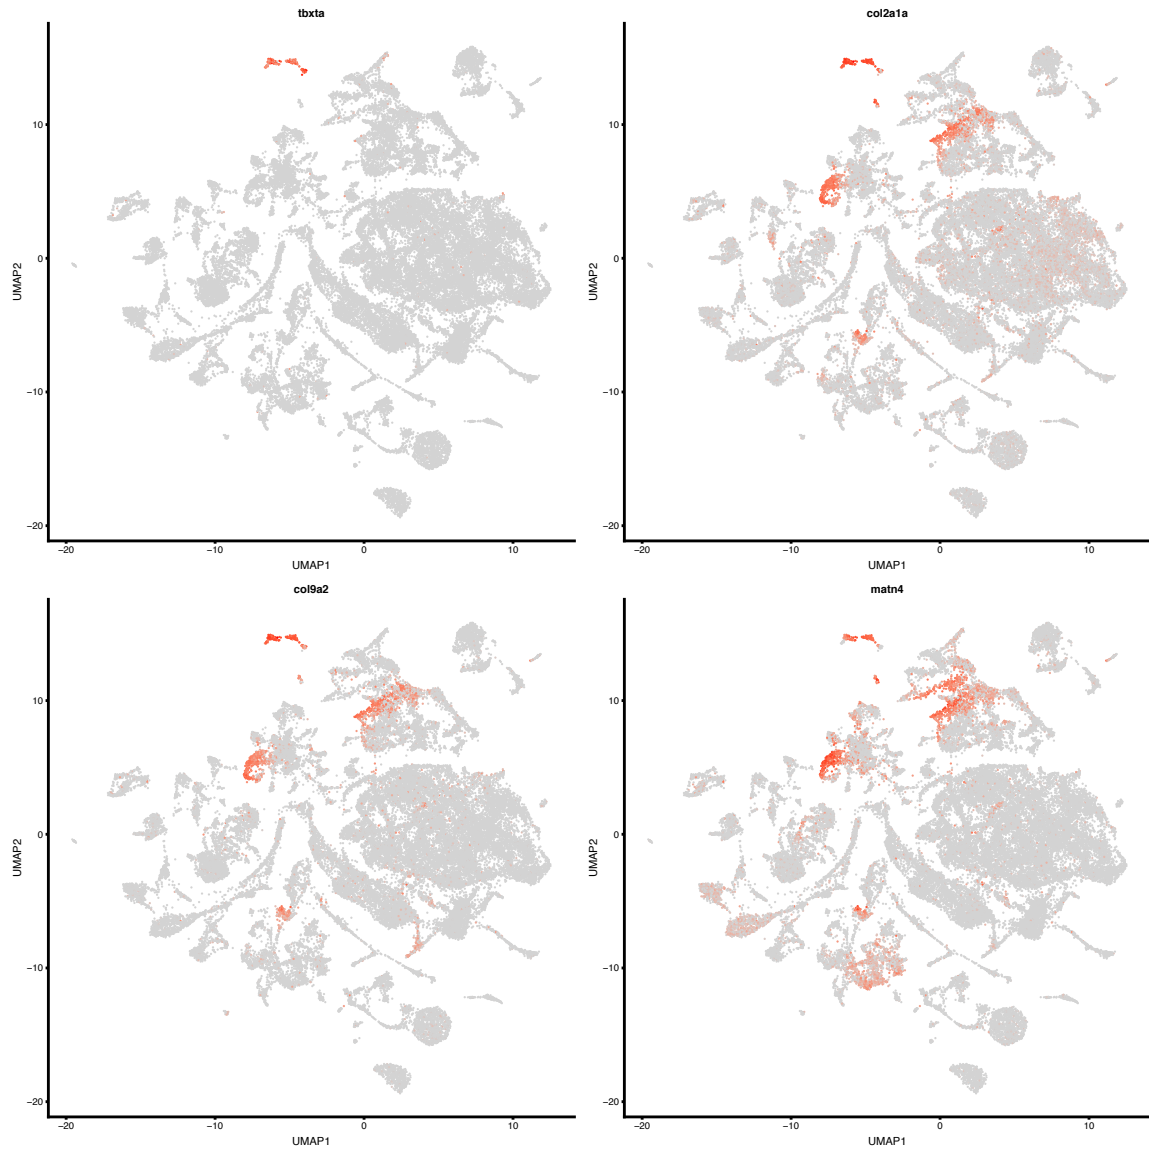

Supplement: NIHMS1545987-supplement-5.pdf [file NIHMS1545987-supplement-5.pdf]
